# Supplementary material for: Preparation and characterization of the enol of acetamide: 1-aminoethenol, a high-energy prebiotic molecule
Source: Royal Society of Chemistry journal article supplement (doi:10.1039/d0sc04906a), 2020-01-01
Supplement: d0sc04906a1.pdf [file d0sc04906a1.pdf]

## Preparation and Characterization of the Enol of Acetamide: 1-Aminoethenol, a High-Energy Prebiotic Molecule

Artur Mardyukov,<sup>[a]</sup> Felix Keul,<sup>[a]</sup> and Peter R. Schreiner<sup>[a]\*</sup>

### Table of Contents

|                                               |    |
|-----------------------------------------------|----|
| Experimental Procedures .....                 | S2 |
| Figure S1 .....                               | S3 |
| Figure S2 .....                               | S4 |
| Figure S3 .....                               | S4 |
| Figure S4 .....                               | S5 |
| Figure S5 .....                               | S5 |
| Table S1. ....                                | S6 |
| References .....                              | S6 |
| AE-CCSD(T)/cc-pVTZ optimized structures ..... | S8 |

## Experimental Procedures

**Matrix Apparatus Design.** For the matrix isolation studies, we used an APD Cryogenics HC-2 cryostat with a closed-cycle refrigerator system, equipped with an inner CsI window for IR measurements. Spectra were recorded with a Bruker IFS 55 FT-IR spectrometer with a spectral range of 4500–400  $\text{cm}^{-1}$  and a resolution of 0.7  $\text{cm}^{-1}$  and UV/Vis spectra were recorded with a JASCO V-670 spectrophotometer (UV/Vis band width of 1.0 nm) equipped with an inner sapphire window. A high-pressure mercury lamp (HBO 200, Osram) with a cut-off filter was used for irradiation.

For the combination of high-vacuum flash pyrolysis with matrix isolation, we employed a small, home-built, water-cooled oven, which was directly connected to the vacuum shroud of the cryostat. The pyrolysis zone consisted of an empty quartz tube with an inner diameter of 8 mm, which was resistively heated over a length of 50 mm by a coaxial wire. The temperature was monitored with a NiCr–Ni thermocouple. Malonamic acid **2** (Sigma-Aldrich) was evaporated (**2**: 70 °C) from a storage bulb into the quartz pyrolysis tube. At a distance of approximately 50 mm, all pyrolysis products were co-condensed with a large excess of argon (typically 60–120 mbar from a 2000 mL storage bulb: circa 50-60 mbar per hour) on the surface of the matrix window at 10 K. Several experiments with pyrolysis temperatures ranging from 200 to 700 °C were performed in order to determine the optimal pyrolysis conditions.

**Synthesis of **2**.** 122 mg (3.05 mmol, 1.00 equiv.) NaOH was dissolved in 10 mL  $\text{H}_2\text{O}$  and 400 mg (3.05 mmol, 1.00 equiv.) ethyl malonate monoamide was added and the resulting mixture was stirred for 3 h under reflux. The solution was cooled to room temperature and acidified with 1 M HCl solution to pH 4. The lyophilization of the mixture at –90 °C gave **2** (314 mg, >99%, quantitative).  $^1\text{H-NMR}$  (400 MHz,  $\text{D}_2\text{O}$ ):  $\delta/\text{ppm}$  3.29 (s,  $\text{CH}_2$ ), 3.28 (t,  $J = 2.3$  Hz, CHD);  $^{13}\text{C-NMR}$  (101 MHz,  $\text{D}_2\text{O}$ ):  $\delta/\text{ppm}$  174.00, 173.38, 43.69, 43.65, 43.45, 43.25. Note: due to the acidity of the  $\text{CH}_2$  group we observed proton exchange with  $\text{D}_2\text{O}$ . Therefore we observed four signals for this group.

**Synthesis of  $d_5$ -**2**.** 100 mg of **2** was dissolved in 3 mL  $\text{D}_2\text{O}$ . After stirring overnight at room temperature, the solvent was removed under reduced pressure. This procedure was repeated 3-5 times.  $^{13}\text{C-NMR}$  (101 MHz,  $\text{D}_2\text{O}$ ):  $\delta/\text{ppm}$  174.4, 174.3, 43.6.

**Computations.** All coupled cluster computations were carried out with the CFOUR<sup>1</sup> program package. In general, all electron coupled cluster level of theory<sup>2</sup> including single, double, and perturbatively included triple excitations [AE-CCSD(T)] utilizing the Dunning correlation consistent split valence basis set cc-pVTZ<sup>3</sup> was employed for geometry optimizations and frequency computations. For B3LYP/6-311++G(2d,2p)<sup>4</sup> computations we used the Gaussian16<sup>5</sup> program package. The quantum mechanical tunneling computations were carried out using the *Polyrate* computer code that is available at no cost at <http://truhlar.chem.umn.edu/content/software>.<sup>6</sup>

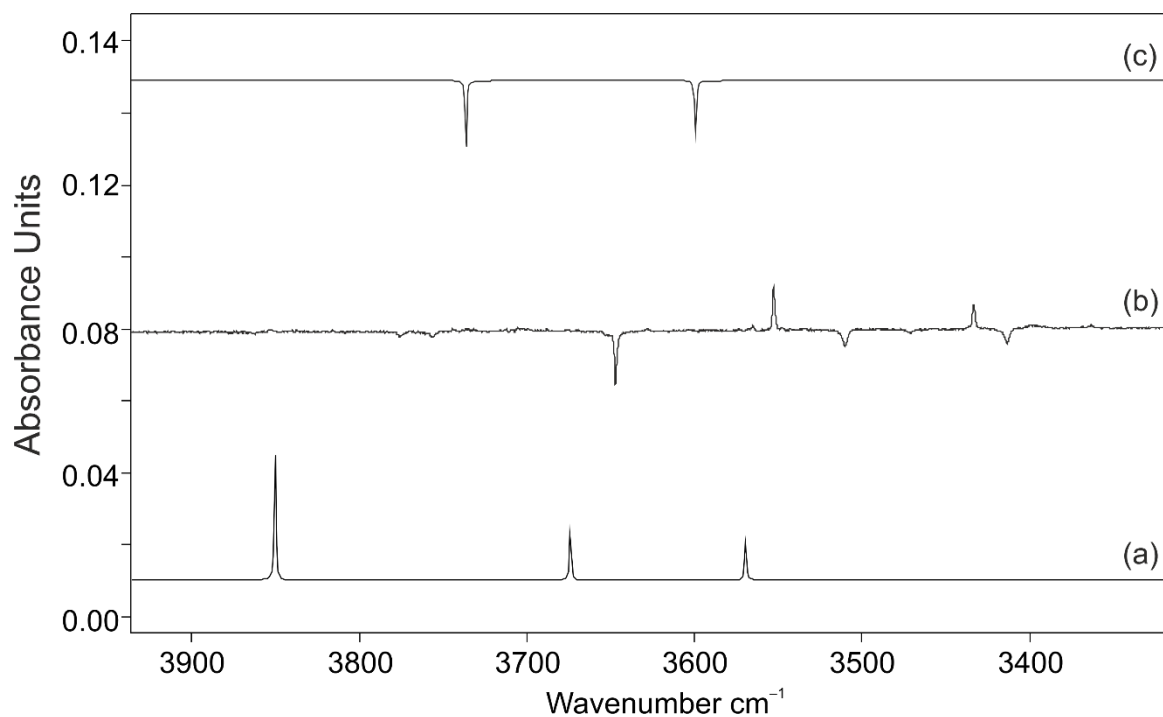

**Figure S1.** IR spectra showing the pyrolysis product of **2** with subsequent trapping in an argon matrix at 10 K. (a) IR spectrum of **1** computed at AE-CCSD(T)/cc-pVTZ (unscaled). (b) IR difference spectra showing the photochemistry of **1** after irradiation with  $\lambda > 270$  nm in argon at 10 K. Downward bands assigned to **1** disappear while upward bands assigned to **3** and **4** appear after 30 min irradiation time. (c) IR spectrum of **3** computed at AE-CCSD(T)/cc-pVTZ (unscaled).

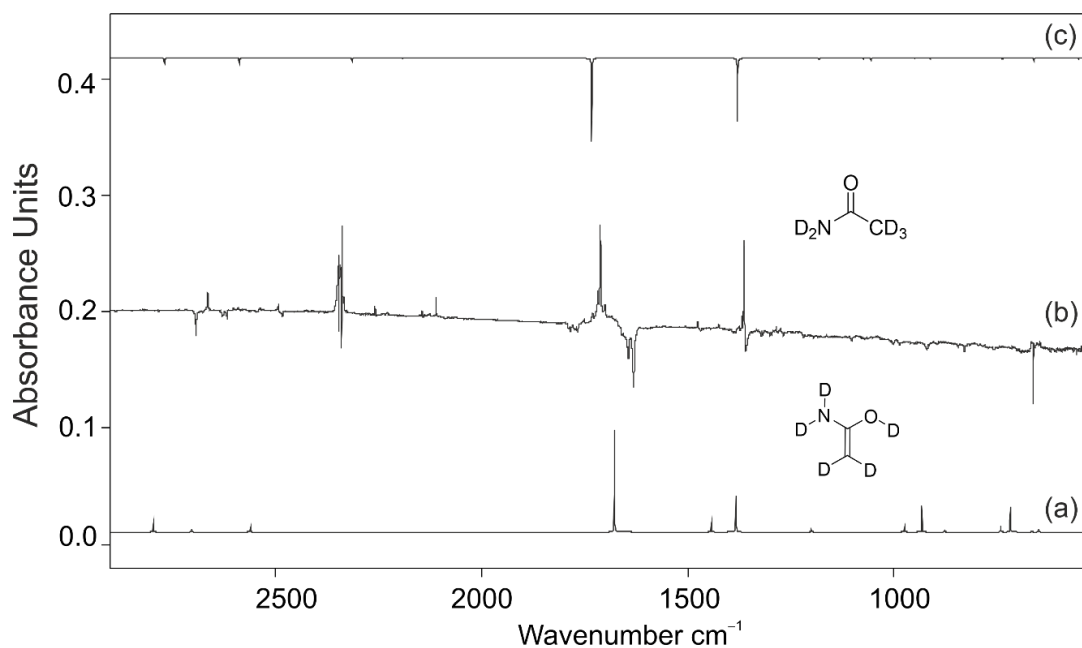

**Figure S2.** IR spectra showing the pyrolysis product of  $d_5$ -2 with subsequent trapping in an argon matrix at 10 K. (a) IR spectrum of  $d_5$ -1 computed at AE-CCSD(T)/cc-pVTZ (unscaled). (b) IR difference spectra showing the photochemistry of  $d_5$ -1 after irradiation with  $\lambda > 270$  nm in argon at 10 K. Downward bands assigned to  $d_5$ -1 disappear while upward bands assigned to  $d_5$ -3 and  $d_2$ -4 appear after 30 min irradiation time. (c) IR spectrum of  $d_5$ -3 computed at AE-CCSD(T)/cc-pVTZ (unscaled).

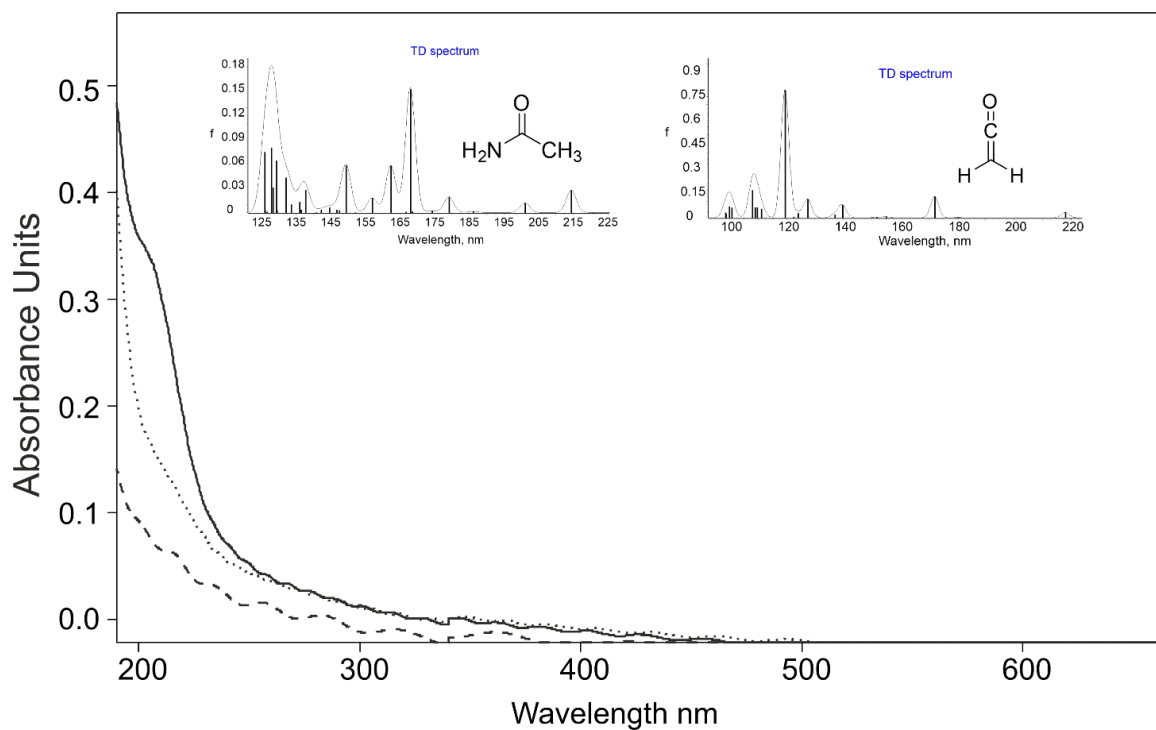

**Figure S3.** Solid line: UV/Vis spectrum of **1** isolated at 10 K in Ar. Dot line: the photochemistry of **1** after irradiation at  $\lambda > 270$  nm for 15 min in argon at 10 K. Dashed line: UV/Vis spectrum of **3** isolated at 10 K in Ar. Inset: computed [TD-B3LYP/6-311++G(2d,2p)] electronic transitions for **3** and **4**.

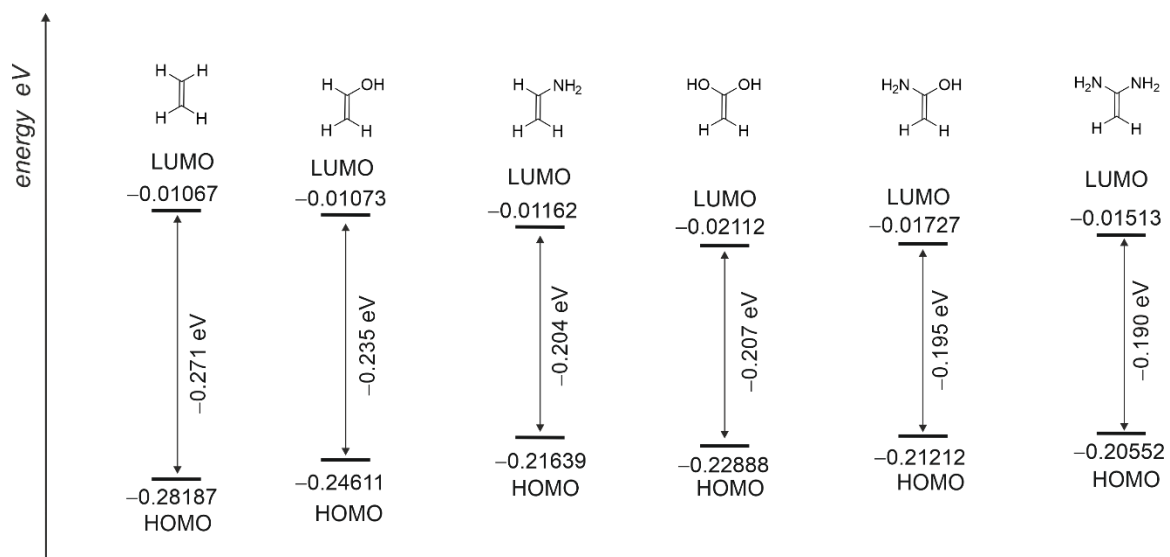

**Figure S4.** HOMO – LUMO energies of ethylene, and variety of enols computed at the B3LYP/6-311+G(2d,2p) level of theory.

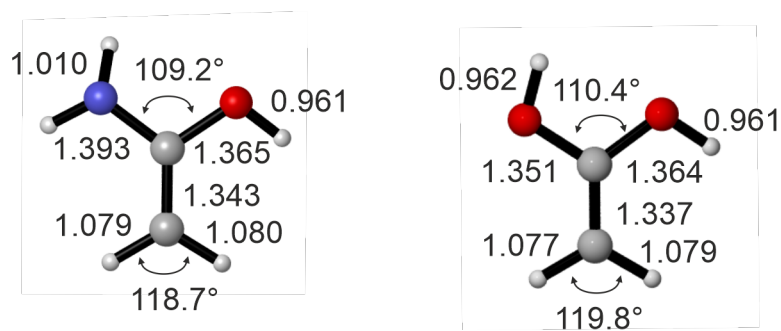

**Figure S5.** Bond lengths (Å) and angles of **1** and **7** at the CCSD(T)/cc-pVTZ level of theory.

**Table S1.** Experimental (Ar matrix, 10 K) and computed IR frequencies of **1** and *d*<sub>5</sub>-**1**, peak positions in cm<sup>-1</sup>, computed infrared intensities (km mol<sup>-1</sup>) in parentheses.

| Mode | <b>1</b>              |                       | <i>d</i> <sub>5</sub> - <b>1</b> |                       | Assignment                 |
|------|-----------------------|-----------------------|----------------------------------|-----------------------|----------------------------|
|      | Computed <sup>a</sup> | Ar, 10 K <sup>b</sup> | Computed <sup>a</sup>            | Ar, 10 K <sup>b</sup> |                            |
| 21   | 3849 (48.1)           | 3647 (s)              | 2801 (29.9)                      | 2692 (s)              | OH str.                    |
| 20   | 3652 (15.2)           | 3510 (s)              | 2695 (10.1)                      | 2617 (s)              | NH <sub>2</sub> asym str.  |
| 19   | 3550 (14.5)           | 3413 (s)              | 2565 (14.6)                      | 2482 (m)              | NH <sub>2</sub> sym. str.  |
| 18   | 3229 (7.2)            | 3132 (w)              | 2407 (2.3)                       |                       | CH <sub>2</sub> asym. str. |
| 17   | 3161 (0.7)            | -                     | 2310 (11.7)                      | 2280                  | CH <sub>2</sub> sym. str.  |
| 16   | 1732 (279.2)          | 1682 (s)              | 1673 (270.7)                     | 1631 (s)              | C=C str.                   |
| 15   | 1655 (53.5)           | 1607 (w)              | 1217 (9)                         | 1197 (w)              | NH <sub>2</sub> bending    |
| 14   | 1477 (6.3)            | 1452 (m)              | 1131 (16.9)                      | 1103 (m)              | CH <sub>2</sub> scissoring |
| 13   | 1438 (47.3)           | 1398 (m)              | 1394 (155.8)                     | 1360 (s)              | C-O str.                   |
| 12   | 1242 (97.6)           | 1202 (s)              | 958 (62.5)                       | 920 (m)               | OH def.                    |
| 11   | 1143 (78.5)           | 1001 (m)              | 914 (13.5)                       | 890 (w)               | COH in pl. def.            |
| 10   | 997 (4.9)             | 974 (m)               | 795 (5.6)                        | 775 (w)               | CCH in pl. def.            |
| 9    | 925 (26.8)            | 916 (m)               | 840 (13.4)                       | 829 (m)               | C-O str. / C-N str.        |
| 8    | 780 (223)             | 730 (m)               | 716 (65.9)                       | 692 (m)               | NCC out of pl. def.        |
| 7    | 756 (42.6)            | 727 (m)               | 594 (28.1)                       | 577 (w)               | CH <sub>2</sub> wagging    |
| 6    | 707 (12.5)            | 694 (m)               | 552 (39.8)                       | 552 (m)               | CH <sub>2</sub> twisting   |
| 5    | 617(115.7)            | 594 (m)               | 473 (82.9)                       | 465 (m)               | C-O wagging                |
| 4    | 513 (10)              | 500 (w)               | 456 (7.3)                        | 449 (w)               | NOC in pl. def.            |
| 3    | 467 (21.5)            | 441 (m)               | 385 (13.9)                       | -                     | NCC in pl. def.            |
| 2    | 424 (70.6)            | 411 (m)               | 308 (42)                         | -                     | O-H wagging                |
| 1    | 276 (44.1)            | -                     | 200 (22.3)                       | -                     | NH <sub>2</sub> twisting   |

<sup>a</sup>AE-CCSD(T)/cc-pVTZ, harmonic approximation, unscaled frequencies, intensities (in parentheses) in km mol<sup>-1</sup>. <sup>b</sup> Experiment: argon matrix, 10 K.; approximate relative intensities (w: weak, m: medium, s: strong).

## References

[1] CFOUR, 2010, <http://www.cfour.de>. J.F. Stanton, J. Gauss, L. Cheng, M.E. Harding, D.A. Matthews, P.G. Szalay with contributions from A.A. Auer, R.J. Bartlett, U. Benedikt, C. Berger, D.E. Bernholdt, S. Blaschke, Y.J. Bomble, S. Burger, O. Christiansen, D. Datta, F. Engel, R. Faber, J. Greiner, M. Heckert, O. Heun, M. Hilgenberg, C. Huber, T.-C. Jagau, D. Jonsson, J. Jusélius, T. Kirsch, K. Klein, G.M. Kopper, W.J. Lauderdale, F. Lipparini, T. Metzroth, L.A. Mück, T. Nottoli, D.P. O'Neill, D.R. Price, E. Prochnow, C. Puzzarini, K. Ruud, F. Schiffmann, W. Schwalbach, C. Simmons, S. Stopkowicz, A. Tajti, J. Vázquez, F. Wang, J.D. Watts and the integral packages MOLECULE (J. Almlöf and P.R. Taylor), PROPS (P.R. Taylor), ABACUS (T. Helgaker, H.J. Aa. Jensen, P. Jørgensen, and J. Olsen), and ECP routines by A. V. Mitin and C. van Wüllen.

[2] a) J. Čížek, *J. Chem. Phys.* **1966**, *45*, 4256-4266; b) R. J. Bartlett, J. D. Watts, S. A. Kucharski, J. Noga, *Chem. Phys. Lett.* **1990**, *165*, 513-522; c) K. Raghavachari, *Annu. Rev. Phys. Chem.* **1991**, *42*, 615-642; d) J. F. Stanton, *Chem. Phys. Lett.* **1997**, *281*, 130-134.

[3] T. H. Dunning, Jr., *J. Chem. Phys.* **1989**, *90*, 1007-1023.

[4] a) A. D. Becke, *Phys. Rev. A* **1988**, *38*, 3098-3100; b) A. D. Becke, *J. Chem. Phys.* **1993**, *98*, 5648-5652; c) C. Lee, W. Yang, R. G. Parr, *Phys. Rev. B* **1988**, *37*, 785-789. d) S. H. Vosko, L. Wilk and M. Nusair, *Can. J. Phys.*, 1980, **58**, 1200. e) R. C. Binning Jr. and L. A. Curtiss, *J. Comput. Chem.*, **11** (1990) 1206-16

[5] Gaussian 16, Revision C.01, M. J. Frisch, G. W. Trucks, H. B. Schlegel, G. E. Scuseria, M. A. Robb, J. R. Cheeseman, G. Scalmani, V. Barone, G. A. Petersson, H. Nakatsuji, X. Li, M. Caricato, A. V. Marenich, J. Bloino, B. G. Janesko, R. Gomperts, B. Mennucci, H. P. Hratchian, J. V. Ortiz, A. F. Izmaylov, J. L. Sonnenberg, D. Williams-Young, F. Ding, F. Lipparini, F. Egidi, J. Goings, B. Peng, A. Petrone, T. Henderson, D. Ranasinghe, V. G. Zakrzewski, J. Gao, N. Rega, G. Zheng, W. Liang, M. Hada, M. Ehara, K. Toyota, R. Fukuda, J. Hasegawa, M. Ishida, T. Nakajima, Y. Honda, O. Kitao, H. Nakai, T. Vreven, K. Throssell, J. A. Montgomery, Jr., J. E. Peralta, F. Ogliaro, M. J. Bearpark, J. J. Heyd, E. N. Brothers, K. N. Kudin, V. N. Staroverov, T. A. Keith, R. Kobayashi, J. Normand, K. Raghavachari, A. P. Rendell, J. C. Burant, S. S.

Iyengar, J. Tomasi, M. Cossi, J. M. Millam, M. Klene, C. Adamo, R. Cammi, J. W. Ochterski, R. L. Martin, K. Morokuma, O. Farkas, J. B. Foresman, and D. J. Fox, Gaussian, Inc., Wallingford CT, 2016.

[6] J. Zheng, J. L. Bao, R. Meana-Pañeda, S. Zhang, B. J. Lynch, J. C. Corchado, Y.-Y. Chuang, P. L. Fast, W.-P. Hu, Y.-P. Liu, G. C. Lynch, K. A. Nguyen, C. F. Jackels, A. Fernandez Ramos, B. A. Ellingson, V. S. Melissas, J. Villà, I. Rossi, E. L. Coitiño, J. Pu, T. V. Albu, A. Ratkiewicz, R. Steckler, B. C. Garrett, A. D. Isaacson, and D. G. Truhlar, *Polyrate* version 2017-C (University of Minnesota, Minneapolis, MN, 2017).

**AE-CCSD(T)/cc-pVTZ optimized structures** (distances in bohr), electronic energies (in hartree) and zero-point vibrational energies (ZPVE).

*anti*-1: 1-Aminoethanol

0 1  
6 1.316987603 -0.601746151 -0.010157044  
1 1.444004235 -1.673309971 -0.035372377  
1 2.196160361 0.024119650 0.044987051  
6 0.087370942 -0.060434280 -0.003329160  
8 -0.166528805 1.281669446 0.003711935  
7 -1.118289881 -0.757196942 0.060182572  
1 0.680211601 1.733932295 -0.052757151  
1 -1.841807929 -0.298567106 -0.475518819  
1 -1.019180633 -1.721970545 -0.215869630  
E = -208.8510944  
ZPVE = 0.07427201

*Syn*-1: 1-Aminoethanol

0 1  
6 1.384870625 -0.427470879 -0.002805692  
1 1.641772193 -1.471522282 -0.102299318  
1 2.168695073 0.307465497 0.094196080  
6 0.103117945 -0.042390580 -0.005854918  
8 -0.241709403 1.281182592 -0.025845562  
7 -1.023452755 -0.887195504 0.052763560  
1 -1.081849338 1.350528027 0.441636166  
1 -1.635188445 -0.737561598 -0.741590076  
1 -0.754339692 -1.860642110 0.088249985  
E = -208.8498955  
ZPVE = 0.074551528

3: acetamide

0 1  
6 0.046143357 -0.085710347 0.000000000  
8 0.432840695 -1.247545668 0.000000000  
7 0.909976685 0.982917074 0.000000000  
6 -1.437338401 0.284383325 0.000000000  
1 1.906622765 0.792166917 0.000000000  
1 0.589211339 1.941926529 0.000000000  
1 -1.910384173 -0.165190939 0.890961833  
1 -1.623375377 1.373184295 0.000000000  
1 -1.910384173 -0.165190939 -0.890961833  
E = -208.8891525  
ZPVE = 0.073922852

4: ketene

0 1  
8 0.000000000 0.000000000 -1.187699589  
6 0.000000000 0.000000000 -0.020723401  
6 0.000000000 0.000000000 1.297853416  
1 -0.941865752 0.000000000 1.821543060  
1 0.941865752 0.000000000 1.821543060  
E = -152.3583735  
ZPVE = 0.031634735

5: ketenimine



0 1  
 1 0.811550531 -1.735064771 0.000000000  
 7 -0.080805138 -1.243042454 0.000000000  
 6 0.025089309 -0.014741079 0.000000000  
 6 0.000939454 1.301809217 0.000000000  
 1 0.000632166 1.840716104 -0.935570967  
 1 0.000632166 1.840716104 0.935570967  
 E = -132.4808658  
 ZPVE = 0.04381128

**6: acetimidic acid**

0 1  
 1 -1.695067798 -0.992424225 0.000000000  
 7 -0.693935035 -1.194139888 0.000000000  
 6 -0.049031468 -0.101727129 0.000000000  
 8 -0.682044724 1.116191481 0.000000000  
 1 -0.018982906 1.813018591 0.000000000  
 6 1.451983751 -0.052413472 0.000000000  
 1 1.847824119 -1.063963639 0.000000000  
 1 1.813917589 0.477862021 0.884777248  
 1 1.813917589 0.477862021 -0.884777248  
 E = -208.8684676  
 ZPVE = 0.074219899

**6a: syn acetimidic acid**

0 1  
 1 -1.705948656 -1.029232329 0.000000000  
 7 -0.697683653 -1.196162033 0.000000000  
 6 -0.050357068 -0.100165289 0.000000000  
 6 1.446845599 -0.052401936 0.000000000  
 8 -0.575369046 1.163662824 0.000000000  
 1 -1.536608465 1.088650647 0.000000000  
 1 1.842098241 -1.064077640 0.000000000  
 1 1.799047270 0.486485943 0.880974094  
 1 1.799047270 0.486485943 -0.880974094  
 E = -208.8696503  
 ZPVE = 0.074322368

**Ammonia**

0 1  
 7 0.070567151 0.000000000 0.000000000  
 1 -0.326828241 0.466495135 -0.807993275  
 1 -0.326828241 -0.932990270 0.000000000  
 1 -0.326828241 0.466495135 0.807993275  
 E = -56.47319724  
 ZPVE = 0.034550228

**Water**

0 1  
 8 0.000000000 0.000000000 0.066414153  
 1 0.000000000 -0.753879329 -0.527020397  
 1 0.000000000 0.753879329 -0.527020397  
 E = -76.33221652  
 ZPVE = 0.02153226

**7: 1,1-Ethenediol**

0 1  
 1 -0.018795953 1.876089259 0.000000000  
 8 -0.625977817 1.130191040 0.000000000  
 6 0.113833334 -0.016309539 0.000000000  
 8 -0.694721943 -1.098785301 0.000000000  
 1 -1.600631789 -0.772277128 0.000000000  
 6 1.448596922 -0.096228935 0.000000000  
 1 1.926045777 -1.062233251 0.000000000  
 1 2.050256108 0.799965571 0.000000000  
 E = -228.708374080697

**TS1**

0 1  
 6 1.278209034 -0.673629139 -0.014949945  
 1 1.353620903 -1.751835885 -0.010462993  
 1 2.176444895 -0.077793675 0.014684372  
 6 0.083316587 -0.068829667 -0.009242255  
 8 -0.024359701 1.307782903 0.059804729  
 7 -1.159806614 -0.712044830 0.059225597  
 1 -0.199332211 1.637097716 -0.826908192  
 1 -1.899702450 -0.173106663 -0.365114738  
 1 -1.141117973 -1.656095126 -0.296191656  
 E = -208.8436818  
 ZPVE = 0.073133701

**TS2**

0 1  
 6 1.130385221 -0.877580877 -0.037290036  
 1 1.057461919 -1.861699400 -0.492555458  
 1 1.645437719 -0.883347268 0.922257105  
 6 -0.042171056 -0.040567442 0.021119496  
 8 0.327945238 1.200829376 -0.002327692  
 7 -1.337193040 -0.362071101 0.003516303  
 1 -2.030981520 0.354635505 -0.118085781  
 1 -1.624617552 -1.309633002 0.155952975  
 1 1.370219352 0.604987991 -0.286943575  
 E = -208.7831629  
 ZPVE = 0.068711139

**TS3**

0 1  
 6 1.530098447 0.062739498 -0.007857107  
 1 2.217192389 -0.759026985 -0.140958108  
 1 1.906235921 1.053902101 0.185889813  
 6 0.211611118 -0.196189486 0.011281768  
 8 -0.731773563 1.057619534 0.057277325  
 7 -0.761432863 -1.092642040 -0.039174891  
 1 -0.688626477 1.490166737 -0.809139092  
 1 -1.442670957 0.211760897 0.045186392  
 1 -0.536975930 -2.011474909 0.313521158  
 E = -208.7499644  
 ZPVE = 0.067686932

**TS4**

0 1  
 6 -1.099178702 0.918924532 0.019222035

|   |              |              |              |
|---|--------------|--------------|--------------|
| 1 | -1.536946921 | 1.034686712  | -0.970545355 |
| 1 | -1.003422608 | 1.857689179  | 0.561470317  |
| 6 | 0.029249426  | 0.013810590  | -0.005431793 |
| 8 | 1.346431882  | 0.264261979  | 0.003464296  |
| 7 | -0.441646802 | -1.212103291 | 0.035376351  |
| 1 | 1.457589845  | 1.206199922  | -0.160502481 |
| 1 | 0.114329554  | -1.992461723 | -0.313008814 |
| 1 | -1.524540932 | -0.564673072 | 0.171875971  |

E = -208.7609226  
ZPVE = 0.068361981

### TS5

|   |              |              |              |
|---|--------------|--------------|--------------|
| 0 | 1            |              |              |
| 6 | 1.505553682  | -0.222206771 | 0.000000000  |
| 1 | 1.825754898  | -1.252698240 | 0.000000000  |
| 1 | 2.242264532  | 0.566254116  | 0.000000000  |
| 6 | 0.199013689  | 0.090987419  | 0.000000000  |
| 8 | -0.535902160 | 1.163247901  | 0.000000000  |
| 7 | -0.902539008 | -0.955838117 | 0.000000000  |
| 1 | -1.437370829 | 0.131999714  | 0.000000000  |
| 1 | -0.940645459 | -1.531993986 | -0.834627538 |
| 1 | -0.940645459 | -1.531993986 | 0.834627538  |

E = -208.7882989  
ZPVE = 0.069797975

### TS6

|   |              |              |              |
|---|--------------|--------------|--------------|
| 0 | 1            |              |              |
| 6 | 1.109558710  | 0.893944699  | -0.023119262 |
| 1 | 1.646503651  | 0.907286691  | 0.922043037  |
| 1 | 1.026978616  | 1.864632715  | -0.501571633 |
| 6 | -0.025618952 | 0.025064687  | 0.016781174  |
| 8 | -1.314210994 | 0.393549289  | 0.022178872  |
| 7 | 0.412946154  | -1.227777765 | -0.048209175 |
| 1 | -1.855434635 | -0.364512127 | -0.229295428 |
| 1 | -0.113410447 | -1.968088851 | 0.421446223  |
| 1 | 1.508941501  | -0.568544200 | -0.219315262 |

E = -208.757561  
ZPVE = 0.068387479
